# Supplementary material for: High-performance electrochemical pseudo-capacitor based on MnO2 nanowires/Ni foam as electrode with a novel Li-ion quasi-ionic liquid as electrolyte
Source: Royal Society of Chemistry journal article supplement (doi:10.1039/c1ee01603b), 2011-01-01
Supplement: c1ee01603b.pdf [file c1ee01603b.pdf]

## High-performance electrochemical pseudo-capacitor based on MnO<sub>2</sub> nanowires/Ni foam as electrode with a novel Li-ion quasi-ionic liquid as electrolyte

Ming-Jay Deng<sup>a</sup>, Jeng-Kuei Chang<sup>b</sup>, Cheng-Chia Wang<sup>c</sup>, Kai-Wen Chen<sup>c</sup>, Chih-Ming Lin<sup>c</sup>, Mau-Tsu Tang<sup>a</sup>, Jin-Ming Chen<sup>a,\*</sup>, Kueih-Tzu Lu<sup>a,\*</sup>

<sup>a</sup>National Synchrotron Radiation Research Center (NSRRC), Hsinchu, Taiwan

<sup>b</sup>Institute of Materials Science and Engineering, National Central University, Taoyuan, Taiwan

<sup>c</sup>Department of Applied Science, National Hsinchu University of Education, Hsinchu, Taiwan

### Materials Synthesis and characterization

The LiClO<sub>4</sub>-OZO quasi-IL with molar ratio 1:4.2 was prepared from LiClO<sub>4</sub> (Acros Inc., AP) and OZO (Acros Inc., 99 %), which were dried at 110 °C and at 55 °C for 12 h in vacuum, respectively.<sup>18</sup> The melting point and boiling point of OZO is 89 °C and 220 °C, respectively. The content of water in the electrolyte was determined to be less than 80 ppm with a Karl-Fischer titration. Mn oxide was deposited anodically from Mn(CH<sub>3</sub>COO)<sub>2</sub> aqueous plating solution (0.25 M) at room temperature, using a three-electrode electrochemical system. Ni foam (area ~1 cm<sup>2</sup>) was pretreated by degreasing in acetone, etching in hydrochloric acid, rinsing with water, soaking in 0.01 M MnCl<sub>2</sub> for 4 h, and rinsing again thoroughly with water, which, after drying, then served as the working electrode. A platinum sheet and a saturated calomel electrode (SCE) were assembled as the counter and reference electrodes, respectively. The electrodeposition was performed under a constant potential 0.45 V vs. SCE to give a total passed charge density 0.4 Coulombs/cm<sup>2</sup>. The typical mass density, measured with a microbalance of accuracy 0.01 mg, of the deposited MnO<sub>2</sub> (thickness about 500 nm) was approximately 0.3 mg cm<sup>-2</sup>. The

surface morphology of the MnO<sub>2</sub> electrode was probed with a scanning electron microscope (SEM, JEOL 6500F). With an ultramicrotome we prepared a Mn oxide section (thickness 40-60nm) for analysis with the transmission electron microscope (TEM, JEOL 2000F). A camera length 120 cm was adopted for the electron diffraction experiment. The electrochemical properties of the Mn oxide electrode in LiClO<sub>4</sub>-OZO quasi-IL were characterized with cyclic voltammetry and chronopotentiometry at 25 °C in an argon-purified glove box (MBraun, UNI LAB-B) in which both moisture and oxygen content were maintained below 1 ppm. A Pt wire as a reference electrode was placed in a fritted glass tube containing N-butyl-N-methyl-pyrrolidinium-bis(trifluoromethylsulfonyl)imide (BMP-TFSI) IL with a ferrocene/ferrocenium couple as a potential standard (Fc/Fc<sup>+</sup> = 50/50 mol %, potential +0.55 V vs. SHE). A spiral Pt wire as a counter electrode was directly immersed in the bulk LiClO<sub>4</sub>-OZO quasi-IL. The applied potential and current were regulated with a potentiostat (AUTOLAB).

The variation of the oxidation state of Mn in the Mn oxide/Ni foam electrode was investigated at various applied potentials in LiClO<sub>4</sub>-OZO quasi-IL with in-situ XAS spectrum recorded by the fluorescence-yield mode. A sealed spectro-electrochemical cell with a fluorescence-transparent Kapton tape window was used. Before measuring the absorption spectra at a given potential, we kept the electrode at a set potential for 15 min to allow the Mn oxide/Ni foam to attain a steady state. The in-situ XAS experiments were conducted at 07A1 beamline of the National Synchrotron Radiation Research Center (NSRRC) in Taiwan. The storage ring was operated with an electron energy of 1.5 GeV with a current of 360 mA. A double-crystal Si(111) monochromator served to tune the x-ray photon energy with energy resolution better than 0.3 eV. The X-ray absorption energy was calibrated using the known Mn K-edge absorption inflection point at 6539.0 eV of a Mn foil,

which was measured before each XAS scan.

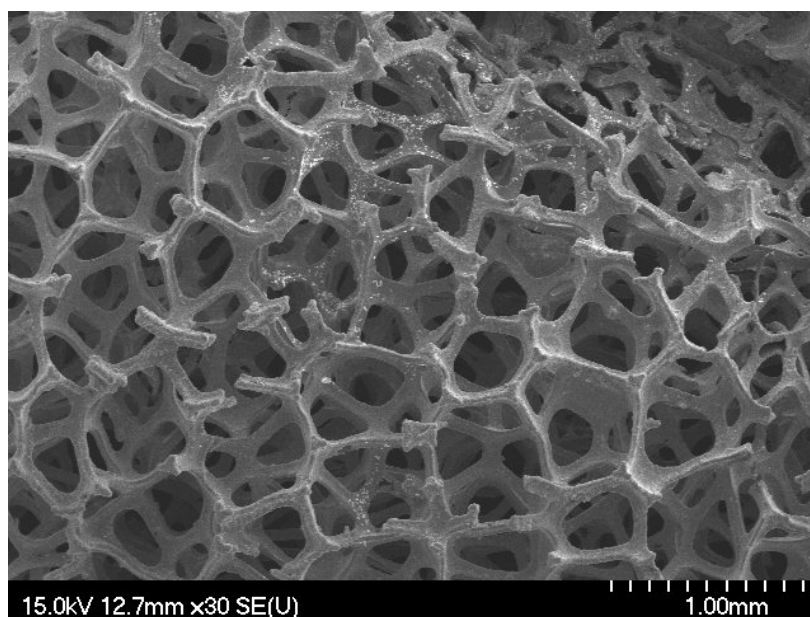

Fig. S1. SEM image of nickel foam

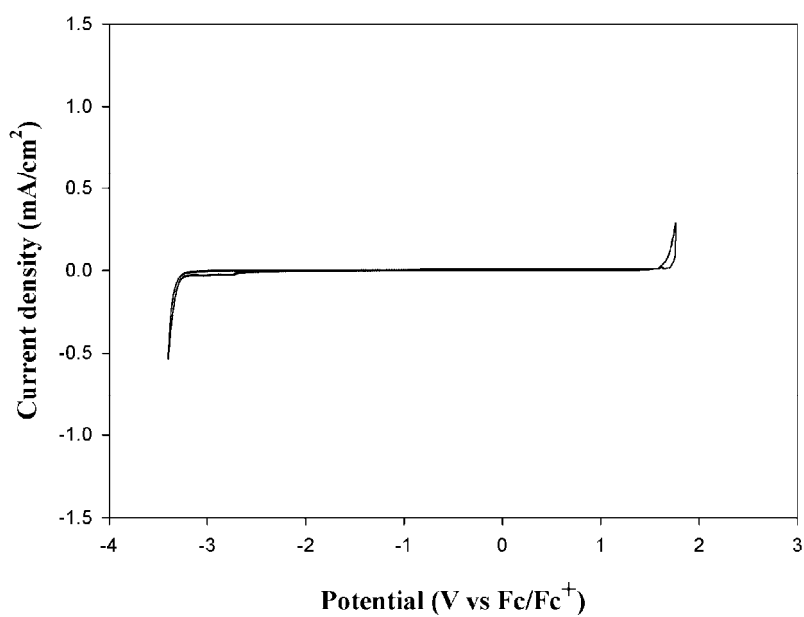

Fig. S2 CV of a glassy carbon electrode recorded in LiClO<sub>4</sub>-OZO quasi-IL at potential sweep rate 5 mV/s.

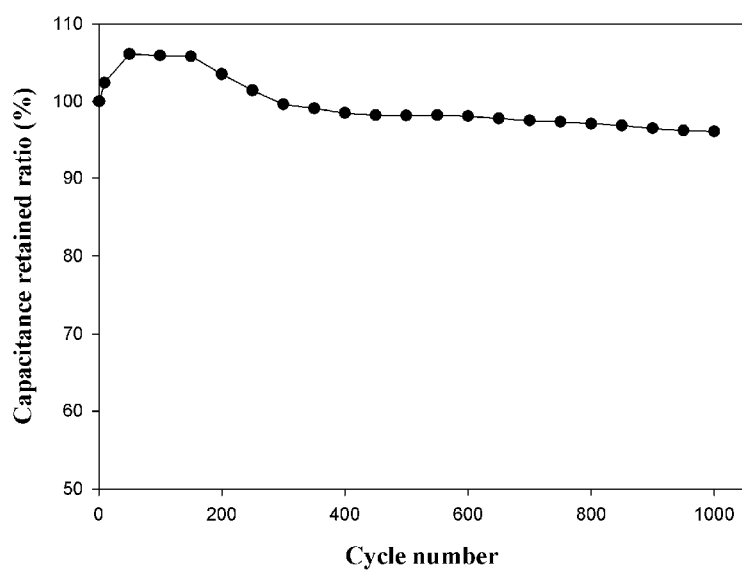

Fig. S3 Variation of oxide capacitance vs. CV cycle number measured in  
 $\text{LiClO}_4\text{-OZO}$  quasi-IL.

## Reference

R. J. Chen, F. Wu, L. Li, B. Xu, X. P. Qiu, and S. Chen, *J. Phys. Chem. C*, 2007, **111**,

5184.
